# Supplementary material
Source: publisher site journal article supplement (https://www.degruyter.com/publication/journal_key/ZCPH/downloadAsset/ZCPH_Flyer%20ZcP%202023.pdf)
Supplement: Supplementary file 1 [file ZCPH_Flyer%20ZcP%202023.pdf]

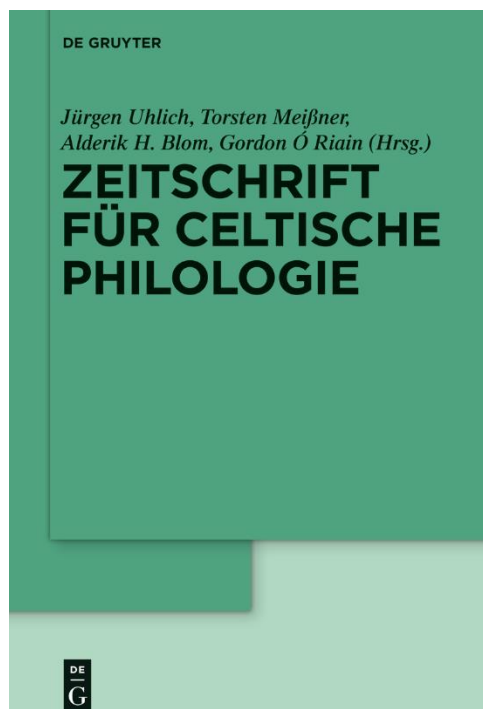

#### 1 VOLUME PER YEAR

ISSNs: Print ISSN: 0084-5302  
Online ISSN: 1865-889X

#### EDITORIAL INFORMATION

Prof. Dr. Jürgen Uhlich, Trinity College, Dublin, Ireland; Prof. Dr. Torsten Meißner, Pembroke College, Cambridge, UK; Prof. Dr. Alderik H. Blom, Philipps-Universität Marburg, Germany; Dr. Gordon Ó Riain, University of Limerick, Ireland

#### INTERNATIONAL EDITORIAL ADVISORY BOARD

Prof. Dr. Joseph Falaky Nagy, Harvard University, Cambridge, USA; Prof. Dr. Katherine Forsyth, University of Glasgow, UK; Prof. Dr. Bernhard Maier, Eberhard-Karls-Universität Tübingen, Germany; Prof. Dr. Ruairí Ó hUiginn, Dublin Institute for Advanced Studies, Ireland; Prof. Dr. Ann Parry Owen, University of Wales, Aberystwyth, UK; Prof. Dr. Patrick Sims-Williams, Aberystwyth University, UK; Prof. Dr. Stefan Zimmer, Rheinische Friedrich-Wilhelms-Universität Bonn, Germany

#### ABSTRACTING AND INDEXING

Zeitschrift für celtische Philologie is covered by the following services: Baidu Scholar; CNKI Scholar (China National Knowledge Infrastructure); CNPIEC – cnpLINKer; Dimensions; EBSCO (relevant databases); EBSCO Discovery Service; ERIH PLUS (European Reference Index for the Humanities and Social Sciences); Genamics JournalSeek; Google Scholar; IBR (International Bibliography of Reviews of Scholarly Literature in the Humanities and Social Sciences) • IBZ (International Bibliography of Periodical Literature in the Humanities and Social Sciences); J-Gate; JournalGuide; JournalTOCs; KESLI-NDSL (Korean National Discovery for Science Leaders); Linguistic Bibliography; Linguistics Abstracts Online; MLA International Bibliography; MyScienceWork; Naver Academic; Naviga (Softweco); Norwegian Register for Scientific Journals, Series and Publishers; OLC Linguistik; Primo Central (ExLibris); ProQuest (relevant databases); Publons; QOAM (Quality Open Access Market); ReadCube; SCImago (SJR); SCOPUS; Semantic Scholar; Sherpa/RoMEO; Summon (ProQuest); TDNet; Ulrich's Periodicals Directory/ulrichsweb; WanFang Data; WorldCat (OCLC); X-MOL; Yewno Discover

## OBJECTIVE:

*Zeitschrift für celtische Philologie* (ZcP) was founded in 1897 by Kuno Meyer and Ludwig Christian Stern. It is thus the oldest significant periodical of Celtic studies still in existence. In the early period, the focus of the ZcP was Celtic (mainly Early Irish) philology and extant texts in Continental Celtic languages (mainly Gaulish). Later, these areas were extended to include modern Celtic languages and typological questions.

## TOPICS:

- Celtic Linguistics
- Celtic Philology
- Celtic History
- Onomastics
- Linguistic Typology

## DETAILS:

**Language:** English, German, French

**Readership:** Researchers working in the fields of Celtic Studies, Celtic Philology, Historical Linguistics

**First published:** 1897

Prices (2023): **Print** €127 / **Online** institutions: €127; individual customers: €49 / **Print+Online** €153

### Submission of manuscripts

Please send your contributions to

Prof. Dr. Jürgen Uhlich, Department of Irish, Trinity College, Dublin 2, Ireland

or to Prof. Dr. Torsten Meißner, Pembroke College, Cambridge CB2 1RF, UK

or to Prof. Dr. Alderik H. Blom, Philipps-Universität Marburg, Vergleichende Sprachwissenschaft und Keltologie, Wilhelm-Röpke-Str. 6E, 35032 Marburg, Germany.

Review copies of publications pertaining to all fields of Celtic philology should be sent to professor Blom. We generally do not publish replies/objections.

All submissions will be reviewed by at least one external referee (peer reviewer). The resulting comments and recommendations will be forwarded anonymously to the relevant author and will be taken into consideration by the editors as part of the editing process.

We look forward to receiving your manuscript!

<https://www.degruyter.com/journal/key/zcph/html>
